# Supplementary material for: Surprisingly facile CO2 insertion into cobalt alkoxide bonds: A theoretical investigation
Source: PubMed Central journal article supplement (PMC4578342; doi:10.3762/bjoc.11.144), 2015-07-31
Supplement: Beilstein_J_Org_Chem-11-1340-s001.pdf [file Beilstein_J_Org_Chem-11-1340-s001.pdf]

# Supporting Information

## for

### Surprisingly facile CO<sub>2</sub> insertion into cobalt alkoxide bonds: A theoretical investigation

Willem K. Offermans<sup>1</sup>, Claudia Bizzarri<sup>1</sup>, Walter Leitner<sup>2</sup> and Thomas E. Müller\*<sup>1</sup>

Address: <sup>1</sup>CAT Catalytic Center, RWTH Aachen University, Worringerweg 2, 52074 Aachen, Germany and <sup>2</sup>Lehrstuhl für Technische Chemie und Petrochemie, ITMC, RWTH Aachen University, Worringerweg 1, D-52074 Aachen, Germany

Email: Thomas E. Müller - thomas.mueller@catalyticcenter.rwth-aachen.de

\*Corresponding author

**Atomic coordinates, calculated bond lengths and bond angles as well as calculated Mulliken charges for the reactant state, the precursor state, the transition state and the product state.**

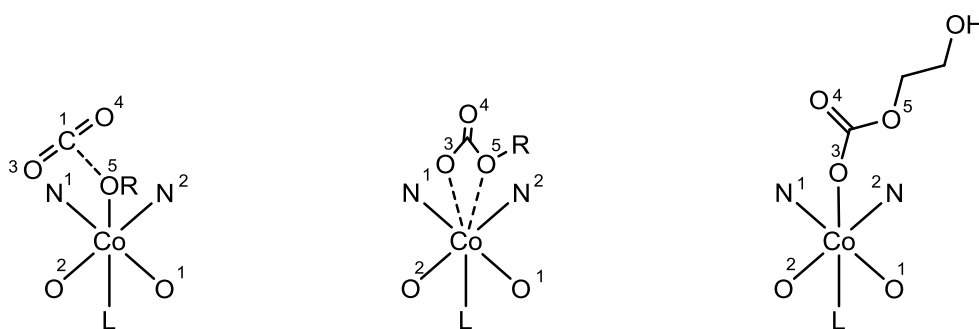

Reactant / precursor state

Transition state

Product state

**Scheme S1:** Numbering applied in the [Co(Salen)(L)] complexes.

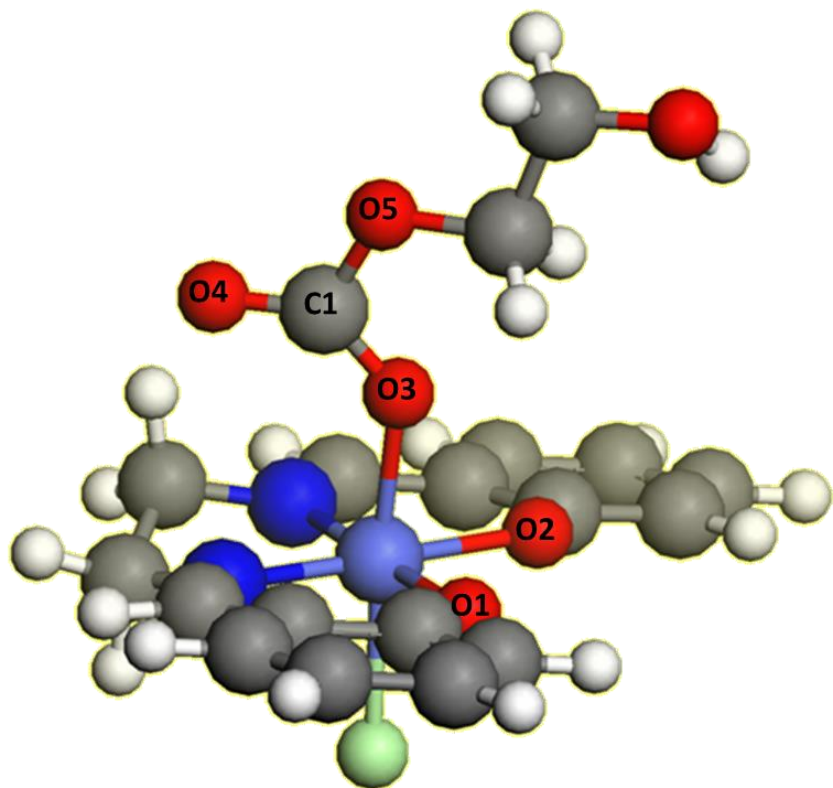

**Figure S1:** Graphical representation of the product state (**PS**).

**Table S1:** Calculated bond lengths and bond angles for selected bonds of the reactant state **RS** and calculated Mulliken charge on the cobalt center.

| Ligand                            | Bond length<br>[Å] |       |                   |                   |                   |                   | Angle<br>[°] | Charge <sup>†</sup><br>[C] |
|-----------------------------------|--------------------|-------|-------------------|-------------------|-------------------|-------------------|--------------|----------------------------|
|                                   | Co-L               | Co-OR | Co-N <sup>1</sup> | Co-N <sup>2</sup> | Co-O <sup>1</sup> | Co-O <sup>2</sup> | O-Co-OC      | Co                         |
| Chloride                          | 2.345              | 1.942 | 1.912             | 1.913             | 1.938             | 1.932             |              | 0.639                      |
| CH <sub>3</sub> COO <sup>-</sup>  | 1.991              | 1.933 | 1.917             | 1.904             | 1.940             | 1.937             |              | 0.703                      |
| CH <sub>3</sub> COO <sup>-a</sup> | 1.995              | 1.933 | 1.917             | 1.908             | 1.943             | 1.937             |              | 0.700                      |
| CH <sub>3</sub> COO <sup>-b</sup> | 1.990              | 1.932 | 1.912             | 1.897             | 1.960             | 1.961             | 106.365      | 0.703                      |
| <i>p</i> -Methoxyphenolate        | 1.983              | 1.937 | 1.920             | 1.919             | 1.928             | 1.933             | 87.439       | 0.709                      |
| CCl <sub>3</sub> COO <sup>-</sup> | 2.034              | 1.914 | 1.919             | 1.906             | 1.936             | 1.935             | 81.459       | 0.702                      |
| 2,4-Dinitrophenolate              | 2.027              | 1.901 | 1.921             | 1.919             | 1.926             | 1.926             | 61.274       | 0.701                      |
| 2,4,6-Trinitrophenolate           | 2.134              | 1.897 | 1.924             | 1.911             | 1.920             | 1.916             | 88.632       | 0.710                      |
| TBD <sup>c</sup>                  | 2.046              | 1.896 | 1.923             | 1.919             | 1.934             | 1.957             | 68.717       | 0.723                      |

† Mulliken charge

<sup>a</sup> Salen ligand **1a** with cyclohexyl backbone

<sup>b</sup> Salen ligand **1b** with cyclohexyl backbone and *t*-Bu-groups

<sup>c</sup> TBD = 1,5,7-Triazabicyclo[4.4.0]dec-5-ene

**Table S2:** Calculated bond lengths and bond angles for selected bonds of the precursor state **preS** and calculated Mulliken charge on the cobalt center.

| Ligand                            | Bond length<br>[Å] |       |                   |                   |                   |                   |                                 |                  |                  | Angle<br>[°]         | Charge <sup>†</sup><br>[C] |
|-----------------------------------|--------------------|-------|-------------------|-------------------|-------------------|-------------------|---------------------------------|------------------|------------------|----------------------|----------------------------|
|                                   | Co-L               | Co-OR | Co-N <sup>1</sup> | Co-N <sup>2</sup> | Co-O <sup>1</sup> | Co-O <sup>2</sup> | O <sup>5</sup> -CO <sub>2</sub> | C-O <sup>3</sup> | C-O <sup>4</sup> | ∠ (CO <sub>2</sub> ) | Co <sup>†</sup>            |
| Chloride                          | 2.278              | 2.084 | 1.903             | 1.922             | 1.934             | 1.922             | 1.678                           | 1.224            | 1.222            | 140.054              | 0.645                      |
| CH <sub>3</sub> COO <sup>-</sup>  | 1.988              | 1.942 | 1.914             | 1.904             | 1.941             | 1.937             | 2.730                           | 1.176            | 1.179            | 172.829              | 0.708                      |
| CH <sub>3</sub> COO <sup>-a</sup> | 1.991              | 1.938 | 1.919             | 1.908             | 1.939             | 1.937             | 2.761                           | 1.175            | 1.179            | 173.374              | 0.703                      |
| CH <sub>3</sub> COO <sup>-b</sup> | 1.986              | 1.938 | 1.915             | 1.902             | 1.957             | 1.957             | 2.783                           | 1.175            | 1.179            | 173.838              | ---                        |
| <i>p</i> -Methoxyphenolate        | 1.981              | 1.948 | 1.918             | 1.917             | 1.931             | 1.932             | 2.721                           | 1.175            | 1.179            | 172.653              | 0.713                      |
| CCl <sub>3</sub> COO <sup>-</sup> | 2.025              | 1.925 | 1.918             | 1.907             | 1.936             | 1.936             | 2.801                           | 1.175            | 1.178            | 174.099              | 0.707                      |
| 2,4-Dinitrophenolate              | 2.020              | 1.917 | 1.918             | 1.920             | 1.930             | 1.925             | 2.801                           | 1.175            | 1.179            | 173.704              | 0.707                      |
| 2,4,6-Trinitrophenolate           | 2.132              | 1.902 | 1.922             | 1.911             | 1.915             | 1.923             | 2.876                           | 1.175            | 1.178            | 175.324              | 0.712                      |
| TBD-PL                            | 2.049              | 1.904 | 1.921             | 1.917             | 1.936             | 1.955             | 3.593                           | 1.174            | 1.176            | 178.158              | 0.723                      |
| None                              | ---                | 1.870 | 1.913             | 1.898             | 1.895             | 1.897             | 3.034                           | 1.174            | 1.177            | 177.663              | 0.663                      |

† Mulliken charge

<sup>a</sup> Salen ligand 1a with cyclohexyl backbone

<sup>b</sup> Salen ligand 1b with cyclohexyl backbone and *t*-Bu-groups

**Table S3:** Calculated bond lengths and bond angles for selected bonds of the transition state **TS** and calculated Mulliken charge on the cobalt center.

| Ligand                            | Bond length<br>[Å] |                     |                   |                   |                   |                   |                   |                                 |                  |                  | Angle<br>[°]         | Charge <sup>†</sup><br>[C] |
|-----------------------------------|--------------------|---------------------|-------------------|-------------------|-------------------|-------------------|-------------------|---------------------------------|------------------|------------------|----------------------|----------------------------|
|                                   | Co-L               | Co-O <sup>5</sup> R | Co-O <sup>3</sup> | Co-N <sup>1</sup> | Co-N <sup>2</sup> | Co-O <sup>1</sup> | Co-O <sup>2</sup> | O <sup>5</sup> -CO <sub>2</sub> | C-O <sup>3</sup> | C-O <sup>4</sup> | ∠ (CO <sub>2</sub> ) | Co <sup>†</sup>            |
| Chloride                          | 2.235              | 2.927               | 3.019             | 1.899             | 1.908             | 1.912             | 1.907             | 1.434                           | 1.263            | 1.246            | 110.206              |                            |
| CH <sub>3</sub> COO <sup>-</sup>  | 1.905              | 2.860               | 2.980             | 1.904             | 1.894             | 1.926             | 1.917             | 1.441                           | 1.264            | 1.243            | 109.909              | 0.724                      |
| CH <sub>3</sub> COO <sup>-a</sup> | 1.903              | 2.950               | 3.027             | 1.907             | 1.903             | 1.923             | 1.914             | 1.438                           | 1.265            | 1.243            | 110.090              | 0.719                      |
| CH <sub>3</sub> COO <sup>-b</sup> | 1.905              | 3.471               | 3.367             | 1.898             | 1.888             | 1.923             | 1.921             | 1.446                           | 1.261            | 1.246            | 111.184              | 0.708                      |
| <i>p</i> -Methoxyphenolate        | 1.930              | 2.478               | 2.846             | 1.918             | 1.915             | 1.932             | 1.923             | 1.428                           | 1.261            | 1.242            | 111.145              |                            |
| CCl <sub>3</sub> COO <sup>-</sup> | 1.967              | 3.469               | 3.196             | 1.903             | 1.899             | 1.912             | 1.908             | 1.419                           | 1.263            | 1.250            | 112.261              |                            |
| 2,4-Dinitrophenolate              | 1.930              | 2.677               | 2.880             | 1.911             | 1.917             | 1.915             | 1.914             | 1.431                           | 1.265            | 1.241            | 109.410              | 0.729                      |
| 2,4,6-Trinitrophenolate           | 1.984              | 2.822               | 2.994             | 1.912             | 1.909             | 1.909             | 1.900             | 1.421                           | 1.265            | 1.245            | 110.685              | 0.723                      |
| TBD-PL                            | 1.943              | 2.592               | 2.850             | 1.917             | 1.910             | 1.939             | 1.931             | 1.451                           | 1.261            | 1.238            | 109.054              |                            |
| None                              | ---                | 2.478               | 2.846             | 1.890             | 1.888             | 1.890             | 1.886             | 1.428                           | 1.261            | 1.242            | 111.145              | 0.640                      |

† Mulliken charge

<sup>a</sup> Salen ligand **1a** with cyclohexyl backbone

<sup>b</sup> Salen ligand **1b** with cyclohexyl backbone and *t*-Bu-groups

**Table S4:** Calculated bond lengths and bond angles for selected bonds of the product state **PS** and calculated Mulliken charge on the cobalt center.

| Ligand                            | Bond length<br>[Å] |                   |                   |                   |                   |                   |                  |                  |                  | Angle<br>[°]         | Charge <sup>†</sup><br>[C] |
|-----------------------------------|--------------------|-------------------|-------------------|-------------------|-------------------|-------------------|------------------|------------------|------------------|----------------------|----------------------------|
|                                   | Co-L               | Co-O <sup>3</sup> | Co-N <sup>1</sup> | Co-N <sup>2</sup> | Co-O <sup>1</sup> | Co-O <sup>2</sup> | C-O <sup>5</sup> | C-O <sup>3</sup> | C-O <sup>4</sup> | ∠ (CO <sub>2</sub> ) | Co <sup>†</sup>            |
| Chloride                          | 2.286              | 1.978             | 1.907             | 1.915             | 1.939             | 1.932             | 1.411            | 1.286            | 1.235            | 112.371              | 0.624                      |
| CH <sub>3</sub> COO <sup>-</sup>  | 1.954              | 1.977             | 1.923             | 1.912             | 1.936             | 1.932             | 1.390            | 1.292            | 1.238            | 113.775              | 0.706                      |
| CH <sub>3</sub> COO <sup>-a</sup> | 1.951              | 1.978             | 1.915             | 1.926             | 1.933             | 1.932             | 1.390            | 1.292            | 1.238            | 113.766              | 0.703                      |
| CH <sub>3</sub> COO <sup>-b</sup> | 1.954              | 1.978             | 1.919             | 1.909             | 1.945             | 1.944             | 1.396            | 1.289            | 1.238            | 114.216              | 0.707                      |
| <i>p</i> -Methoxyphenolate        | 1.949              | 1.985             | 1.929             | 1.927             | 1.917             | 1.926             | 1.393            | 1.291            | 1.238            | 113.612              | 0.715                      |
| CCl <sub>3</sub> COO <sup>-</sup> | 1.989              | 1.954             | 1.926             | 1.914             | 1.928             | 1.926             | 1.383            | 1.298            | 1.236            | 113.917              | 0.704                      |
| 2,4-Dinitrophenolate              | 1.973              | 1.937             | 1.908             | 1.920             | 1.934             | 1.924             | 1.401            | 1.294            | 1.231            | 112.119              | 0.699                      |
| 2,4,6-Trinitrophenolate           | 2.082              | 1.931             | 1.931             | 1.919             | 1.908             | 1.913             | 1.372            | 1.304            | 1.234            | 114.338              | 0.710                      |
| TBD-PL                            | 1.999              | 1.941             | 1.932             | 1.927             | 1.930             | 1.948             | 1.390            | 1.298            | 1.233            | 114.283              | 0.727                      |
| None                              | ---                | 1.895             | 1.918             | 1.903             | 1.891             | 1.893             | 1.365            | 1.315            | 1.228            | 113.944              | 0.668                      |

† Mulliken charge

<sup>a</sup> Salen ligand **1a** with cyclohexyl backbone

<sup>b</sup> Salen ligand **1b** with cyclohexyl backbone and *t*-Bu-groups
